# Supplementary material
Source: publisher site journal article supplement (https://www.dovepress.com/article/545569)
Supplement: Supplementary file 1 [file 545569%20Revised%20Figure%20S1.docx]

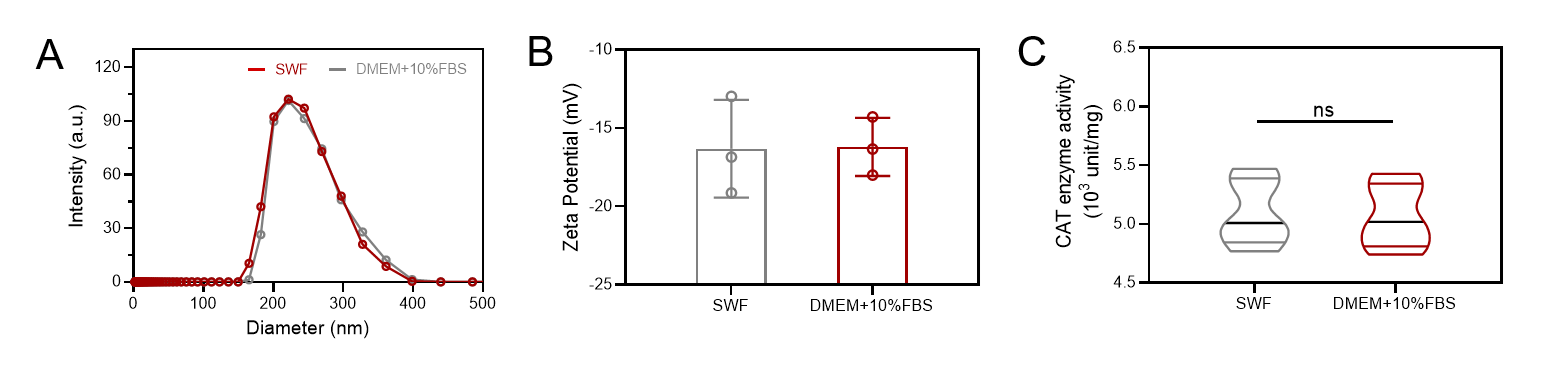


**Figure S1.** Stability evaluation under physiological conditions. (A) Hydrodynamic diameter, (B) zeta potential and (C) CAT-like activity quantified by ELISA under physiologic condition.
